# Supplementary material for: Exploring the Potential Enhancing Effects of Trans-Zeatin and Silymarin on the Productivity and Antioxidant Defense Capacity of Cadmium-Stressed Wheat
Source: MDPI journal article supplement (doi:10.3390/biology11081173), 2022-08-04
Supplement: s1 [file s1]

**Table S1.** The composition of the nutrient solution used for watering wheat plants.

| Chemical substance                               | Chemical formula                                                                                                 | Amount ( $\mu\text{M}$ ) |
|--------------------------------------------------|------------------------------------------------------------------------------------------------------------------|--------------------------|
| Calcium nitrate                                  | $\text{Ca}(\text{NO}_3)_2$                                                                                       | 2000                     |
| Potassium sulfate                                | $\text{K}_2\text{SO}_4$                                                                                          | 700                      |
| Magnesium sulfate                                | $\text{MgSO}_4$                                                                                                  | 500                      |
| Monopotassium phosphate                          | $\text{KH}_2\text{PO}_4$                                                                                         | 100                      |
| Potassium chloride                               | $\text{KCl}$                                                                                                     | 100                      |
| Boric acid                                       | $\text{H}_3\text{BO}_3$                                                                                          | 1                        |
| Manganese sulfate                                | $\text{MnSO}_4$                                                                                                  | 1                        |
| Copper sulfate                                   | $\text{CuSO}_4$                                                                                                  | 0.25                     |
| Ammonium molybdate                               | $(\text{NH}_4)_6\text{Mo}_7\text{O}_{24}$                                                                        | 0.01                     |
| Fe–<br>ethylenediaminetetraacetic<br>acid (EDTA) | $(\text{OOCCH}_2)_2\text{NCH}_2\text{CH}_2\text{NCCH}_2\text{COO})_2$<br>$\text{FeNa} \cdot x\text{H}_2\text{O}$ | 100                      |
